# Supplementary material for: Two new hexa-Ni-substituted polyoxometalates in the form of an isolated cluster and 1-D chain: syntheses, structures, and properties
Source: Royal Society of Chemistry journal article supplement (doi:10.1039/d0ce01446j), 2020-01-01
Supplement: d0ce01446j1.pdf [file d0ce01446j1.pdf]

## Supporting Information

### Two new hexa-Ni-substituted polyoxometalates from isolated cluster to 1-D chain: syntheses, structures, and properties

Jun-Jun Sun,<sup>a</sup> Yue-Lin Wang<sup>b</sup> and Guo-Yu Yang<sup>\*a</sup>

<sup>a</sup>MOE Key Laboratory of Cluster Science, School of Chemistry and Chemical Engineering, Beijing Institute of Technology, Beijing 100081, China. E-mail: ygy@bit.edu.cn; ygy@ffirms.ac.cn

<sup>b</sup>College of Science, Inner Mongolia Agricultural University, Hohhot, Inner Mongolia 010018, China

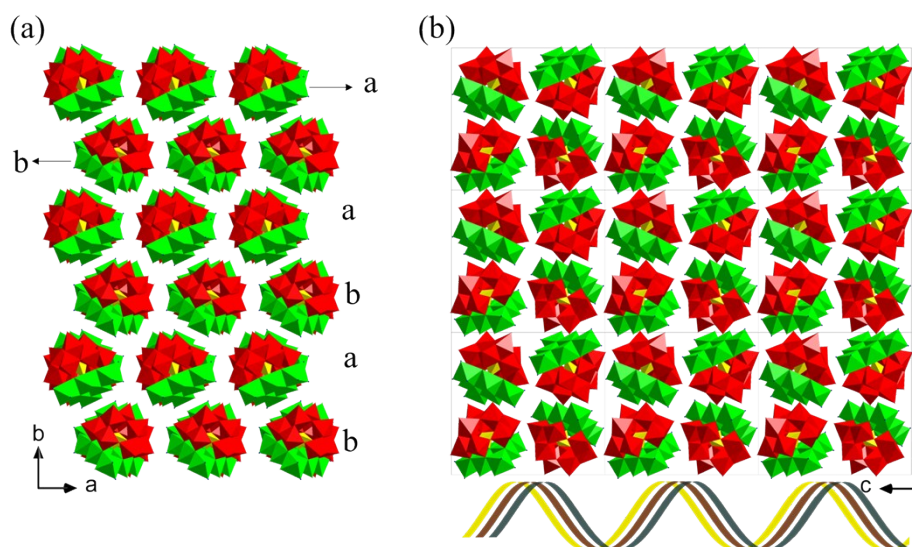

**Figure S1** Three-dimensional stacking diagram of compound **1** along the *c*-axis (a) and the *a*-axis (b).

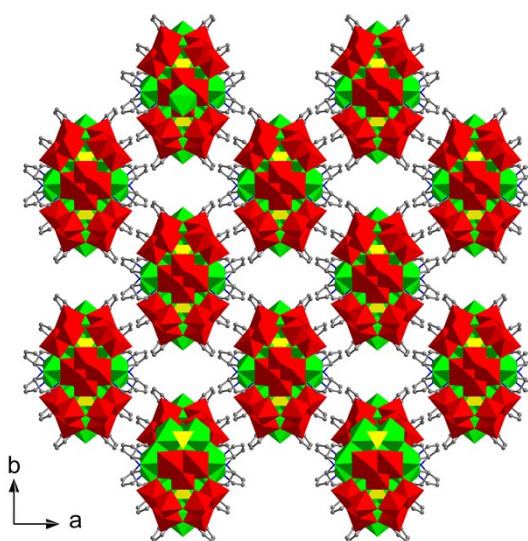

**Figure S2** Three-dimensional stacking diagram of compound **2** along the *c*-axis

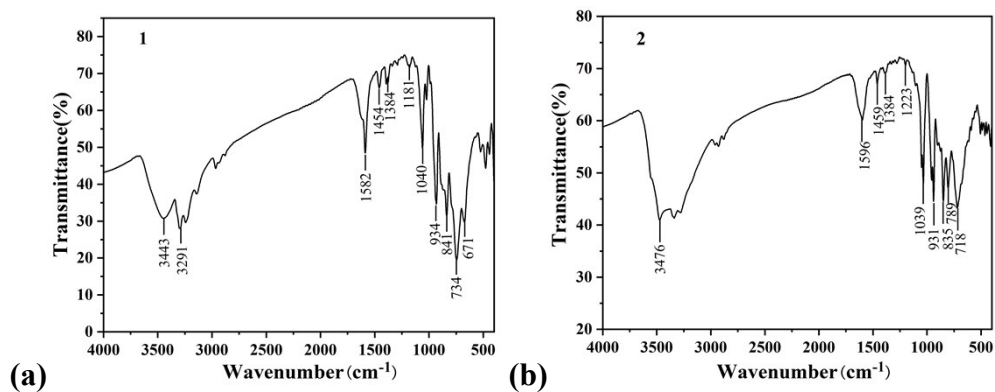

Figure S3 The IR spectra of compounds 1–2.

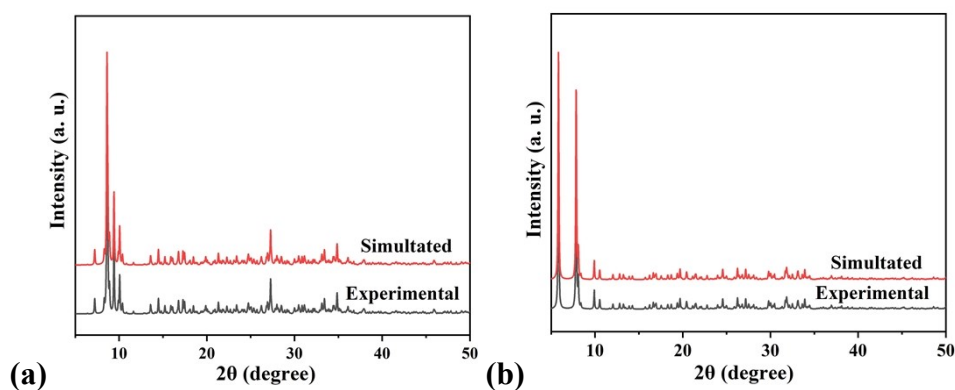

Figure S4 Powder X-ray diffraction patterns of compounds 1-2.

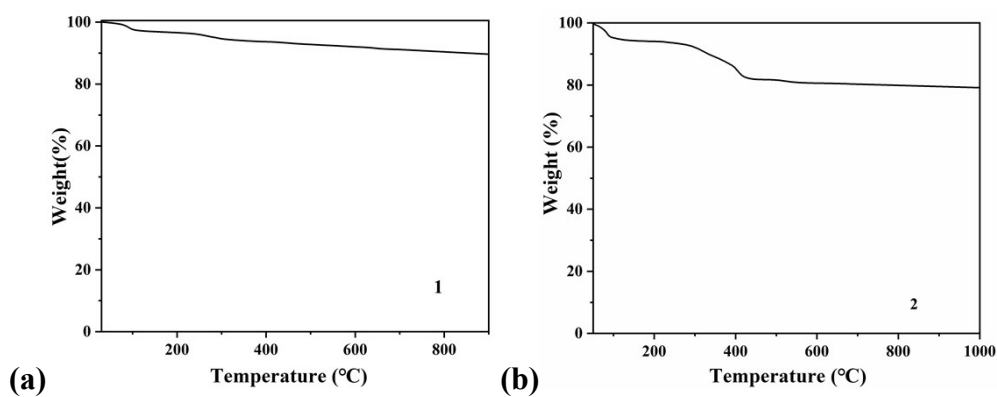

Figure S5 The TG curves of compounds 1-2.

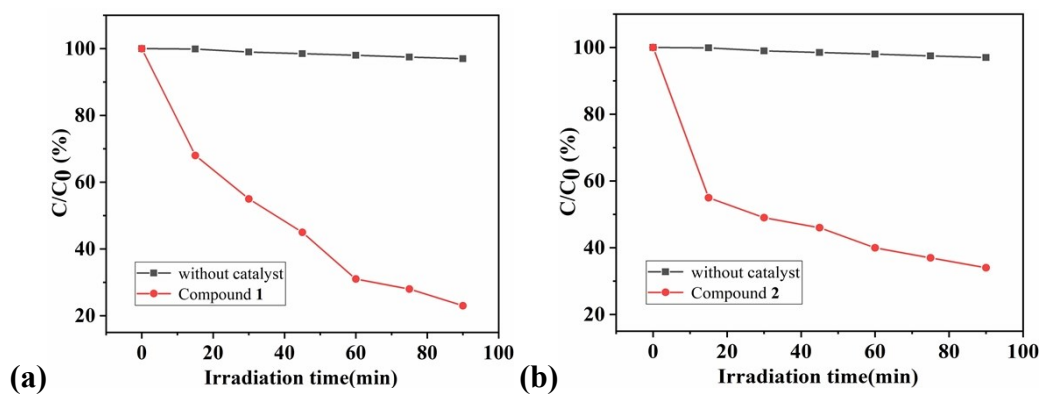

Figure S6 Photocatalytic decomposition rate of MB solution under UV (a) 1 and (b) 2.

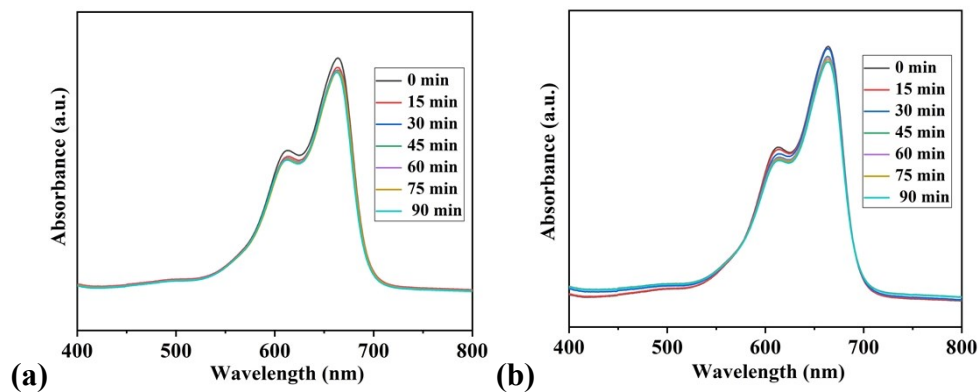

**Figure S7** Photocatalytic decomposition rate of MB solution under dark room (a) **1** and (b) **2**.

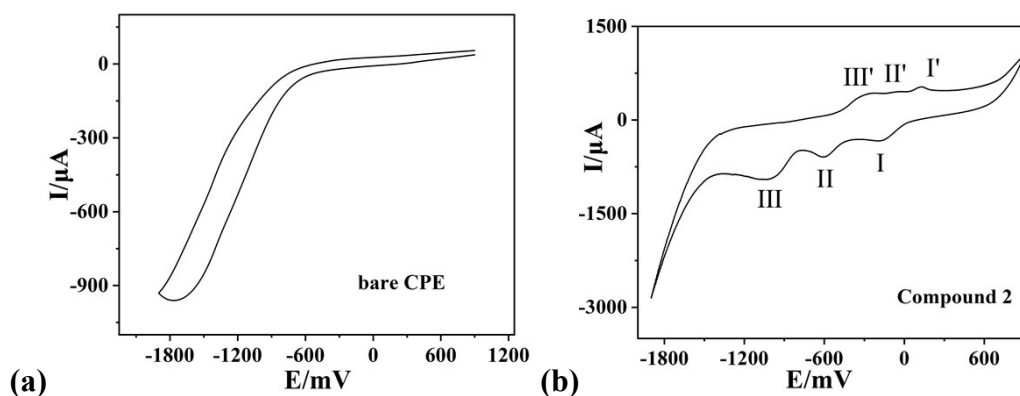

**Figure S8** (a) Cyclic voltammograms of the bare CPE and (b) **2**-CPE in 0.5 M H<sub>2</sub>SO<sub>4</sub>/Na<sub>2</sub>SO<sub>4</sub> solutions (pH = 4.8) aqueous solution at 300mV·s<sup>-1</sup>

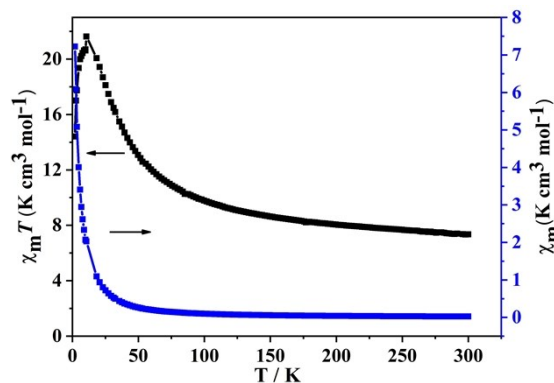

**Figure S9** Temperature dependence of  $\chi_m$  and  $\chi_m T$  values for **1**.

Since compounds **1-2** contain {Ni<sub>6</sub>PW<sub>9</sub>} SBUs, we only take compound **1** as an example to analyze its magnetic properties. The magnetic susceptibility of **1** was measured at 2-300 K (Fig. S9). The experimental  $\chi_m$  values at 300 K and 50 K were 1.12 emu mol<sup>-1</sup> and 1.61 emu mol<sup>-1</sup>, displaying a slight increasing trend. Upon cooling,  $\chi_m$  acutely increased to reach 7.485 emu mol<sup>-1</sup> at 2 K. the value of  $\chi_m T$  increased from 7.437 emu mol<sup>-1</sup> K at 300 K per formula unit, and it reach a maximum of 21.925 emu mol<sup>-1</sup> at 13 K and then it suddenly decreased below 13 K, which might be ascribed to the existence of zero-field splitting. This behavior of  $\chi_m T$  for **1** showed the presence of overall ferromagnetic coupling interactions with S = 6 spin ground state for the hexa-Ni<sup>II</sup> cluster in **1**.

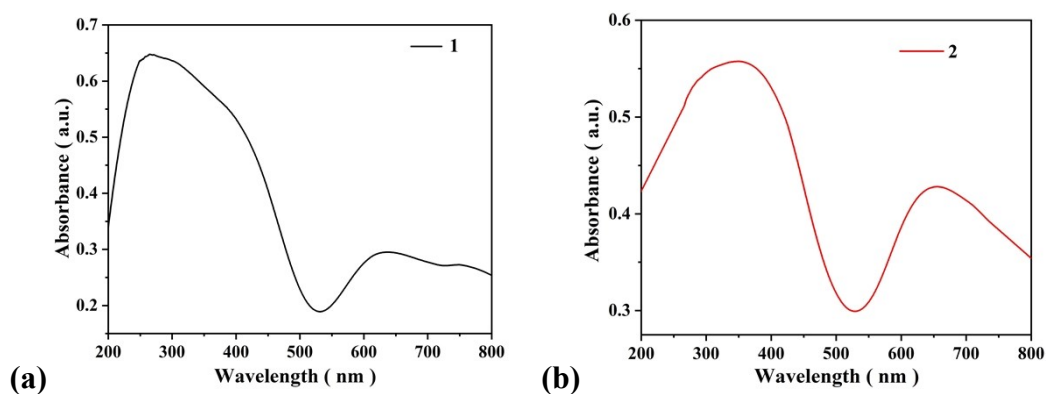

**Figure S10** The electronic absorption spectrum of compounds **1–2** in the crystalline state.

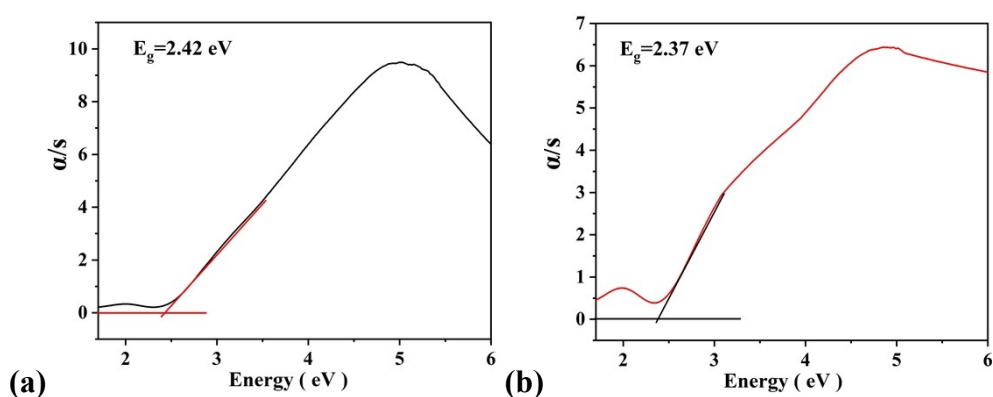

**Figure S11** Diffuse reflection spectra of Kubelka–Munk (K-M) function versus energy (eV) of compound **1(a)–2(b)**.

### Optical Band Gaps

To evaluate the semiconductor behaviors and photocatalytic activities of compounds **1–2**, the diffuse reflection spectra of compounds **1–2** were carried out in the crystalline state at room temperature (Fig. S10). The band gaps ( $E_g$ ) of compounds **1–2** were obtained from the Kubelka–Munk (K-M) function  $F$  vs  $E$ ,<sup>[1]</sup> which are estimated to be 2.42 eV for **1** and 2.37 eV for **2**, respectively (Fig. S11). The band gap values indicate that compounds **1–2** may respond to UV irradiation and have the potential capacity for photocatalytic reactions.<sup>[2]</sup>

1 Pankove, J. I. *Optical Processes in Semiconductors*; Prentice–Hall, Inc.: Englewood Cliffs, NJ, 1971; 34.

2 (a) T. Wen, D. X. Zhang and J. Zhang, *Inorg. Chem.*, 2013, **52**, 12; (b) M. C. Das, H. Xu, Z. Y. Wang, G. Srinivas, W. Zhou, Y. F. Yue, V. N. Nesterov, G. D. Qian and B. L. Chen, *Chem. Commun.*, 2011, **47**, 11715; (c) W. Q. Kan, B. Liu, J. Yang, Y. Y. Liu and J. F. Ma, *Cryst. Growth Des.*, 2012, **12**, 2288.
